# Supplementary material for: Monolithic carbon foam-supported Au nanoparticles with excellent catalytic performance in a fixed-bed system
Source: Royal Society of Chemistry journal article supplement (doi:10.1039/c7nj03018e), 2017-01-01
Supplement: c7nj03018e1.pdf [file c7nj03018e1.pdf]

Electronic Supplementary Material (ESI) for New Journal of Chemistry.

## **Monolithic carbon foam-supported Au nanoparticles with excellent catalytic performance in a fixed-bed system**

Xiang Liu <sup>a,b</sup>, Yan Li <sup>c</sup>, Zheng Xing <sup>a</sup>, Xiaohua Zhao <sup>d,\*</sup>, Ningning Liu <sup>a</sup>, Fangyuan Chen <sup>a</sup>

<sup>a</sup> Zhenjiang Key Laboratory of Functional Chemistry & Institute of Medicine & Chemical Engineering, Zhenjiang College, Zhenjiang 212028, China.

<sup>b</sup> Biofuels Institute of Jiangsu University, Zhenjiang 212013, China.

<sup>c</sup> School of Pharmacy, Taizhou Polytechnic College, Taizhou 225300, China

<sup>d</sup> School of Materials Science and Engineering, Jiangsu University, Zhenjiang 212013, China.

\*Corresponding author: [zhao12\\_19@163.com](mailto:zhao12_19@163.com)

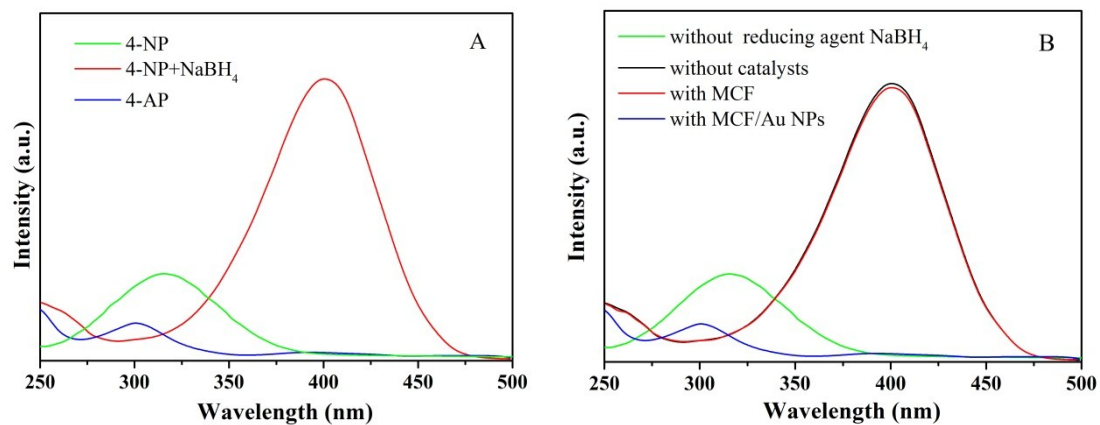

Fig. S1 (A) UV-Vis spectra of 4-NP (green line) and after (red line ) adding NaBH<sub>4</sub> solution and 4-AP (blue line) solution; (B) UV-Vis spectra of 4-NP (green line) without NaBH<sub>4</sub> in the presence of MCF/Au NPs as catalyst, 4-NP (black line) with NaBH<sub>4</sub> in the absence of MCF/Au NPs as catalyst, 4-NP (red line) with NaBH<sub>4</sub> in the presence of MCF as catalyst and 4-NP (blue line) with NaBH<sub>4</sub> in the presence of MCF/Au NPs as catalyst.

Table S1 The reaction rate at different flow rates

| Au content (wt. %) | Flow rates (mL/min) | Conversion % | TOF ( $\text{min}^{-1}$ ) |
|--------------------|---------------------|--------------|---------------------------|
| 0.32               | 2                   | 98.9         | 0.122                     |
| 0.32               | 4                   | 69.3         | 0.171                     |
| 0.32               | 6                   | 40.1         | 0.256                     |
| 0.32               | 8                   | 6.3          | 0.031                     |

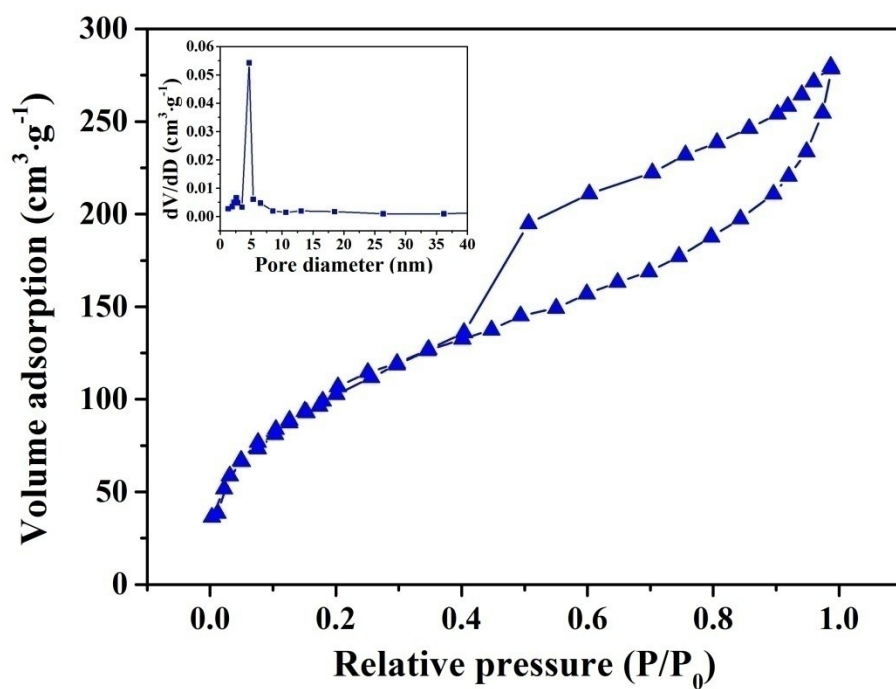

Fig. S2 Nitrogen adsorption-desorption isotherms and the corresponding BJH pore size distributions of MCF/AuNPs composites.

Table S2. Comparison of the catalytic performance in the reduction of 4-NP as reported in the literature

| Catalysts                  | C <sub>NaHB<sub>4</sub></sub> (M) | C <sub>4-NP</sub> (mM) | K <sub>app</sub> (min <sup>-1</sup> ) | Ref.      |
|----------------------------|-----------------------------------|------------------------|---------------------------------------|-----------|
| MCF/Au nanoparticles       | 0.3                               | 0.5                    | 0.12                                  | This work |
| Au nanoparticles/GO        | 0.16                              | 7                      | 0.18                                  | 1         |
| Au/graphene                | 0.1                               | 0.1                    | 0.19                                  | 2         |
| Au nanowires /glass fibers | 0.25                              | 2.5                    | 0.39                                  | 3         |
| CNDs/Au NPs                | 0.08                              | 3.5                    | 0.0943                                | 4         |

### References

1. Y. Zhang, S. Liu, W. Lu, L. Wang, J. Tian and X. Sun, *Catal. Sci. Technol.*, 2011, **1**, 1142-1144.
2. J. Li, C.-y. Liu and Y. Liu, *J. Mater. Chem.*, 2012, **22**, 8426-8430.
3. J. He, W. Ji, L. Yao, Y. Wang, B. Khezri, R. D. Webster and H. Chen, *Adv. Mater.*, 2014, **26**, 4151-4155.
4. X. Qin, W. Lu, G. Chang, Y. Luo, A. M. Asiri, A. O. Al-Youbi and X. Sun, *Gold Bulletin*, 2012, **45**, 61-67.
